# Supplementary material
Source: publisher figshare collection journal article supplement (https://karger.figshare.com/ndownloader/files/30717530)
Supplement: Supplementary file 1 [file 30717530]

Supplemental Table 1. Primers of *COL4A5* used for Sanger sequencing.

| Gene | Sense 5’-3’ | Antisense 5’-3’ |
| --- | --- | --- |
| COL4A5 | TTATTTTTATGGGTTGTCATTTAGT | GACACTATATCCCTTCTTCTACATTC |
